# Supplementary material
Source: Research Square preprint supplement (doi:10.21203/rs.3.rs-9237636/v1)
Supplement: Supplementary file 1 [file 6c8de0292cce121311522b37.docx]

**Appendix for Supplementary Material**

**Table 3 – Robustness Check with 2-year lags: Export intensity & Firm innovation – Moderating effect of BG affiliation, BG Size & BG Technology relatedness (ppmlhdfe model)**

| **DV: Firm Innovation** | **Model 1** | **Model 2** | **Model 3** | **Model 4** |
| --- | --- | --- | --- | --- |
| **b/se** | **b/se** | **b/se** | **b/se** |
| Export Intensity (t-2) | 0.0834** | -0.00884 | 0.205** | 0.00163 |
|  | (0.0412) | (0.0549) | (0.0857) | (0.0534) |
| BG Affiliation # Export Intensity (t-1) |  | 0.105* |  |  |
|  |  | (0.0673) |  |  |
| BG Size (t-2) |  |  | 0.593 |  |
|  |  |  | (0.439) |  |
| Export Intensity (t-2) # BG Size (t-2) |  |  | -0.0345* |  |
|  |  |  | (0.0200) |  |
| BG Tech Relatedness (t-2) |  |  |  | 0.205 |
|  |  |  |  | (1.352) |
| Export Intensity (t-2) # BG Tech Relatedness (t-2) |  |  |  | 0.194* |
|  |  |  |  | (0.116) |
| R&D expenditure (t-2) | 0.0288 | 0.0290 | 0.0398 | 0.0346 |
|  | (0.0546) | (0.0353) | (0.0637) | (0.0641) |
| Firm Size (t-2) | 0.156 | 0.0913 | 0.149 | 0.175 |
|  | (0.139) | (0.120) | (0.142) | (0.133) |
| Firm Age (t-2) | 0.191 | -0.125 | 0.354 | 0.240 |
|  | (0.524) | (0.507) | (0.552) | (0.576) |
| Leverage (t-2) | -0.332* | -0.287* | -0.397* | -0.326 |
|  | (0.197) | (0.173) | (0.220) | (0.199) |
| Liquidity (t-2) | 0.271* | 0.223 | 0.328* | 0.323* |
|  | (0.146) | (0.140) | (0.176) | (0.181) |
| Patent Stock (t-2) | 0.325*** | 0.298*** | 0.332*** | 0.310*** |
|  | (0.0873) | (0.0814) | (0.106) | (0.105) |
| Industry concentration(t-2) | -0.147 | -0.196 | -0.208 | -0.222 |
|  | (0.219) | (0.192) | (0.283) | (0.283) |
| Industry effects | Yes | Yes | Yes | Yes |
| Year effects | Yes | Yes | Yes | Yes |
| Constant | 0.168 | 2.621 | -2.247 | 0.0154 |
|  | (2.435) | (2.378) | (3.150) | (2.901) |
| Observations | 2129 | 2679 | 1747 | 1745 |

Standard errors in parentheses; Robust standard errors clustered at firm level.

Firm and year fixed effects included.

* *p* < 0.10, ** *p* < 0.05, *** *p* < 0.01

**Table 4 – Robustness Check: Systems GMM Model for addressing potential endogeneity**

| **DV: Firm Innovation** | **Model 1** |
| --- | --- |
|  | **b/se** |
| Export Intensity (t-1) | 1.505** |
|  | (0.612) |
| R&D expenditure (t-1) | 0.175 |
|  | (0.306) |
| Firm Size (t-1) | 0.419* |
|  | (0.240) |
| Firm Age (t-1) | 0.139 |
|  | (0.320) |
| Leverage (t-1) | -1.246** |
|  | (0.554) |
| Liquidity (t-1) | -0.797 |
|  | (0.874) |
| Industry concentration(t-1) | 0.522 |
|  | (0.440) |
| Constant | -10.05** |
|  | (4.780) |
| Observations | 3141 |
| Groups | 302 |
| Instruments | 32 |
| AR(1) p-value | 0.000 |
| AR(2) p-value | 0.741 |
| Hansen test p-value | 0.846 |

Standard errors in parentheses

* *p* < 0.10, ** *p* < 0.05, *** *p* < 0.01

Two-step system GMM estimates reported.

Robust standard errors in parentheses.

Instruments collapsed to avoid proliferation.

AR(2) tests for second-order serial correlation.

Hansen test reports instrument validity.

**Table 5 – Robustness Check: Reverse Causality Using Future Export Intensity (t+1) (ppmlhdfe model)**

| **DV: Firm Innovation** | **Model 1** |
| --- | --- |
| **b/se** |
| Export Intensity (t+1) | 0.0358 |
|  | (0.0285) |
| R&D expenditure (t-1) | 0.0923 |
|  | (0.0736) |
| Firm Size (t-1) | 0.170 |
|  | (0.148) |
| Firm Age (t-1) | -0.312 |
|  | (0.494) |
| Leverage (t-1) | -0.375** |
|  | (0.184) |
| Liquidity (t-1) | 0.280 |
|  | (0.184) |
| Patent Stock (t-1) | 0.529*** |
|  | (0.0875) |
| Industry concentration(t-1) | -0.0625 |
|  | (0.198) |
| Industry effects | Yes |
| Year effects | Yes |
| Constant | 0.182 |
|  | (2.181) |
| Observations | 2073 |

Standard errors in parentheses

Robust standard errors clustered at firm level.

Firm and year fixed effects included.

* *p* < 0.10, ** *p* < 0.05, *** *p* < 0.01
